# AUTHOR CORRECTION

For the article by Mantilla *et al.* in the May 2002 issue of ANESTHESIOLOGY (2002; 96:1140–6), figures 1 and 2 were reversed. The figures should have appeared as follows:

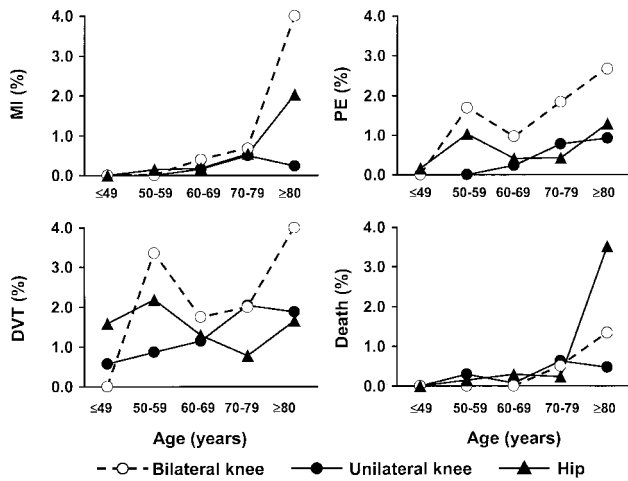

Fig. 1. Frequency of myocardial infarction (MI), pulmonary embolism (PE), deep venous thrombosis (DVT), or death within 30 days after primary total hip or knee arthroplasty according to age and surgical procedure.

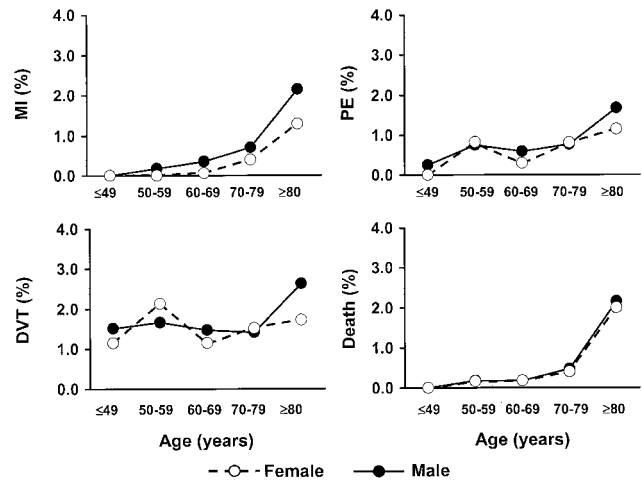

Fig. 2. Age- and gender-specific frequency of myocardial infarction (MI), pulmonary embolism (PE), deep venous thrombosis (DVT), or death within 30 days after primary total hip or knee arthroplasty.
